# Supplementary material for: The hafnium-mediated NH activation of an amido-borane
Source: Royal Society of Chemistry journal article supplement (doi:10.1039/c1cc11320h), 2011-01-01
Supplement: c1cc11320h.pdf [file c1cc11320h.pdf]

## Supplementary Information

### The hafnium mediated NH activation of an amido-borane

*Elizabeth A. Jacobs, Anna-Marie Fuller, Simon J. Lancaster\* and Joseph A. Wright*

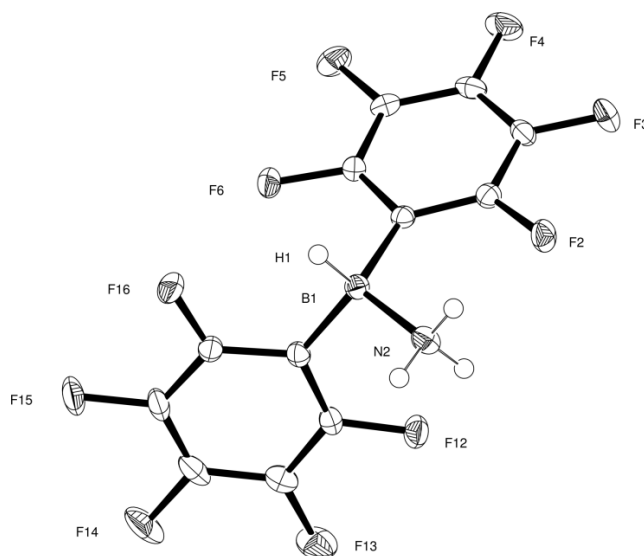

Figure S1. ORTEP representation of the structure of **1**.C<sub>6</sub>D<sub>6</sub> showing 50% probability ellipsoids; the C<sub>6</sub>D<sub>6</sub> solvent molecule has been omitted for clarity. Selected bond lengths [Å] and angles [°] B(1)—N(2) 1.603(2), B(1)—C(1) 1.6309(18), B(1)—C(11) 1.6324(19); N(2)—B(1)—C(1) 111.02(10), N(2)—B(1)—C(11) 107.97(10), C(1)—B(1)—C(11) 112.70(10).

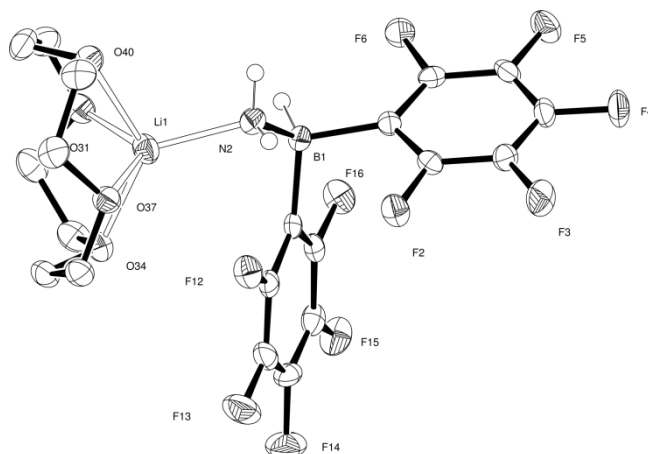

Figure S2. ORTEP representation of the structure of **2**·12-crown-4 showing 50% probability ellipsoids; hydrogen atoms have been omitted for clarity. Selected bond lengths [ $\text{\AA}$ ] and angles [ $^\circ$ ] B(1)—N(2) 1.544(2), B(1)—C(1) 1.661(2), B(1)—C(11) 1.648(3); N(2)—B(1)—C(1) 114.38(13), N(2)—B(1)—C(11) 111.78(14), C(11)—B(1)—C(1) 105.21(13), B(1)—N(2)—Li(1) 114.32(13).

Table S1. Hydrogen bonds present within the solid state structure of **3**.

| D-H $\cdots$ A              | d(D-H)  | d(H $\cdots$ A) | d(D $\cdots$ A) | $\angle$ (DHA) |
|-----------------------------|---------|-----------------|-----------------|----------------|
| N(11)-H(11A) $\cdots$ O(71) | 0.79(4) | 2.30(4)         | 3.053(3)        | 158(4)         |
| N(11)-H(11B) $\cdots$ F(26) | 0.84(3) | 2.19(3)         | 2.874(3)        | 139(3)         |
| N(41)-H(41A) $\cdots$ O(76) | 0.86(3) | 2.14(3)         | 2.995(3)        | 173(3)         |
| N(41)-H(41B) $\cdots$ F(62) | 0.78(3) | 2.34(3)         | 2.894(3)        | 129(3)         |

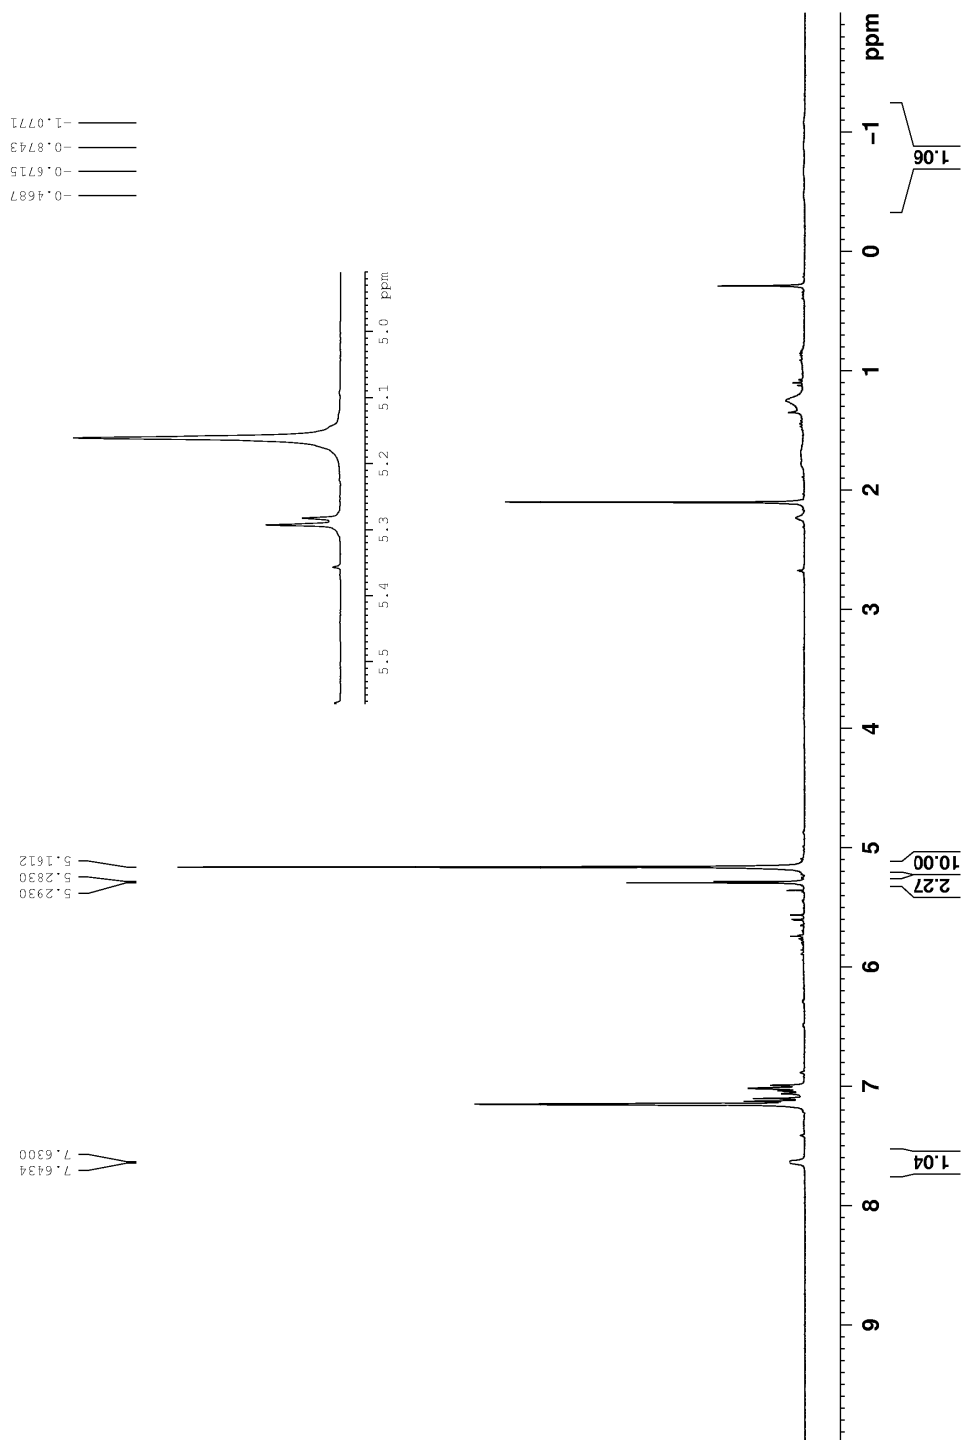

Figure S3.  $^1\text{H}$  NMR spectrum of crude reaction mixture (toluene solution) from the preparation of **4** illustrating the three different peaks observed in the Cp region. The major peak corresponds to product **4**.

## Experimental

All reactions were performed under a dry nitrogen atmosphere using standard Schlenk techniques in pre-dried glassware. Solvents were dried using an appropriate drying agent and distilled under nitrogen prior to use, dichloromethane (CaH<sub>2</sub>), light petroleum (Na/dyglyme/benzophenone), tetrahydrofuran (sodium/benzophenone) and toluene (sodium); 12-crown-4 was degassed and dried over activated 4 Å molecular sieves prior to use.

NMR samples were prepared using degassed deuterated solvents dried over activated 4 Å molecular sieves. NMR spectra were obtained using a Bruker Avance DPX300 spectrometer at 23 °C, *J* values are given in Hz. Chemical shifts are reported in ppm and referenced to residual solvent resonances (<sup>1</sup>H, <sup>13</sup>C); <sup>19</sup>F is relative to CFCl<sub>3</sub>; <sup>11</sup>B is relative to Et<sub>2</sub>O·BF<sub>3</sub>. Elemental analyses were carried out at the Department of Health and Human Sciences, London Metropolitan University.

### **H<sub>3</sub>N·BH(C<sub>6</sub>F<sub>5</sub>)<sub>2</sub> (1)**

Ammonia was passed over a solution of Me<sub>2</sub>S·BH(C<sub>6</sub>F<sub>5</sub>)<sub>2</sub> (4.60 g, 11.3 mmol) in toluene (45 cm<sup>3</sup>) for approximately 5 minutes. The solvent was then removed under reduced pressure and the crude product recrystallized from dichloromethane–light petroleum mixture at –25 °C, (3.40 g, 83%). Crystals suitable for X-ray analysis were grown at room temperature from the NMR sample. Elemental analysis found: C 39.9, H 1.0, N 4.0. Calculated for C<sub>12</sub>H<sub>4</sub>BF<sub>10</sub>N: C 39.7, H 1.1, N 3.9. δ<sub>H</sub>/ppm (300.1 MHz, C<sub>6</sub>D<sub>6</sub>) 3.18 (1H, br, BH), 1.73 (3H, br, NH<sub>3</sub>). δ<sub>B</sub>/ppm (96.3 MHz, C<sub>6</sub>D<sub>6</sub>) –15.8 (d, *J*<sub>BH</sub> 102). δ<sub>F</sub>/ppm (C<sub>6</sub>D<sub>6</sub>) –134.9 (4F, d, *J*<sub>FF</sub> 23, *o*-F), –157.5 (2F, t, *J*<sub>FF</sub> 20, *p*-F), –163.4 (4F, m, *m*-F).

### **[Li][NH<sub>2</sub>BH(C<sub>6</sub>F<sub>5</sub>)<sub>2</sub>] (2)**

A solution of **1** (0.30 g, 0.8 mmol) in thf (10 cm<sup>3</sup>) was cooled to -78 °C and n-BuLi (0.8 mmol) added before warming to room temperature to yield [Li(thf)<sub>x</sub>][H<sub>2</sub>NBH(C<sub>6</sub>F<sub>5</sub>)<sub>2</sub>] (**2**). 12-crown-4 (0.1 cm<sup>3</sup>, 0.8 mmol) was added before removal of the volatiles under reduced pressure to yield a colourless solid. Recrystallization from dichloromethane–light petroleum solution yielded X-ray quality crystals of [Li(12-crown-4)][NH<sub>2</sub>BH(C<sub>6</sub>F<sub>5</sub>)<sub>2</sub>], (0.31 g, 72%). Elemental analysis found: C 43.9, H 3.4, N 2.5. Calculated for C<sub>20</sub>H<sub>19</sub>BF<sub>10</sub>LiNO<sub>4</sub>: C 44.0, H 5.3, N 2.6. δ<sub>H</sub>/ppm (300.1 MHz, CDCl<sub>3</sub>) 3.71 (16H, s, CH<sub>2</sub>), 3.22 (2H, br NH<sub>2</sub>) δ<sub>C</sub>/ppm (75.5 MHz {<sup>1</sup>H}, CDCl<sub>3</sub>) 66.9 (CH<sub>2</sub>). δ<sub>B</sub>/ppm (96.3 MHz, CDCl<sub>3</sub>) -15.5 (d, *J*<sub>BH</sub> 96). δ<sub>F</sub>/ppm (282.4 MHz, CDCl<sub>3</sub>) -135.5 (4F, d, *J*<sub>FF</sub> 23, *o*-F), -163.2 (2F, br, *p*-F), -166.2 (4F, m, *m*-F).

### **Cp<sub>2</sub>Hf{NH<sub>2</sub>BH(C<sub>6</sub>F<sub>5</sub>)<sub>2</sub>}<sub>2</sub> (3)**

To a freshly prepared solution of **2** (1.1 mmol) in toluene (15 cm<sup>3</sup>) at -78 °C was added Cp<sub>2</sub>HfCl<sub>2</sub> (0.44 g, 1.1 mmol) before returning to room temperature. The pale brown solution was stirred over night to yield a colourless precipitate of LiCl, which was separated by filtration. Removal of the volatiles from the filtrate yielded a sticky colourless solid, which was recrystallized from a thf–light petroleum solvent mixture to yield few X-ray quality crystals of Cp<sub>2</sub>Hf{NH<sub>2</sub>BH(C<sub>6</sub>F<sub>5</sub>)<sub>2</sub>}<sub>2</sub>. NMR analysis displayed a mixture of products and isolation of a crystalline compound could not be repeated despite numerous attempts.

### **Crystallography**

Data were processed using the CrysAlisPro program,<sup>S1</sup> while solving the structure was carried out within the WinGX suite.<sup>S2</sup> The structures were determined by the direct methods routines in SHELXS (**1**, **2** and **3**)<sup>S3</sup> or SIR-92 (**4**),<sup>S4</sup> and refined by full-matrix least-squares methods on *F*<sup>2</sup> in SHELXL.<sup>S3</sup> The non-hydrogen atoms were refined with anisotropic

thermal parameters. Hydrogen atoms on cyclopentadienyl rings and on the nitrogen atom in **4** were included in idealised positions and their  $U_{\text{iso}}$  values were set to ride on the  $U_{\text{eq}}$  values of the parent carbon atoms; all other hydrogen atoms were located in the Fourier difference map and freely refined.

- S1. *CrysAlisPro*, Oxford Diffraction Ltd., Abingdon, UK, 2009.
- S2. L. J. Farrugia, *J. Appl. Cryst.*, **1999**, 32, 837–838.
- S3. G. M. Sheldrick, *Acta Cryst. A*, **2008**, 64, 112–122.
- S4. A. Altomare, G. Cascarano, C. Giacovazzo and A. Guagliardi, *J. Appl. Cryst.*, **1993**, 26, 343–350.
